# Supplementary material for: Structure-retentive synthesis of a highly ordered mesoporous Nb2O5/N-doped graphene nanocomposite with superior interfacial contacts and improved visible-light photocatalysis
Source: Royal Society of Chemistry journal article supplement (doi:10.1039/c9cy00555b), 2019-01-01
Supplement: c9cy00555b1.pdf [file c9cy00555b1.pdf]

**Structure Retentively Synthesis of Highly Ordered Mesoporous Nb<sub>2</sub>O<sub>5</sub>/N-Doped Graphene  
Nanocomposite with Superior Interfacial Contacts and Improved Visible Photocatalysis**

Hui Huang,<sup>a</sup> Jun Zhou,<sup>a</sup> Jie Zhou<sup>a</sup> and Mingshan Zhu <sup>\*b</sup>

<sup>a</sup> *Department of Chemistry, Nantong Vocational University, Nantong 226007, P.R. China.*

<sup>b</sup> *School of Environment, Jinan University, Guangzhou, 510632, P.R. China*

\*Email: [zhumingshan@jnu.edu.cn](mailto:zhumingshan@jnu.edu.cn)

**Electronic Supplementary Information**

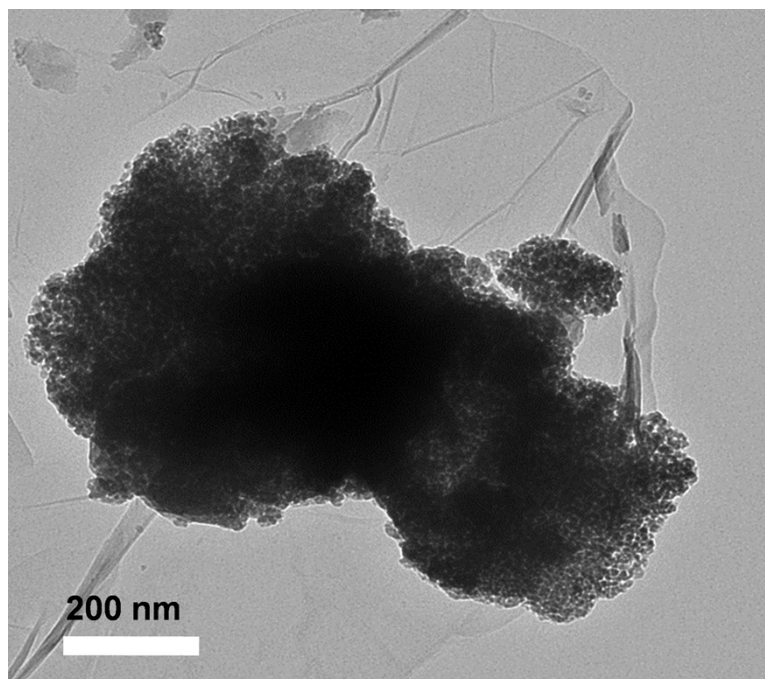

**Fig. S1** Low magnification of TEM image of MNb-NGR-5.

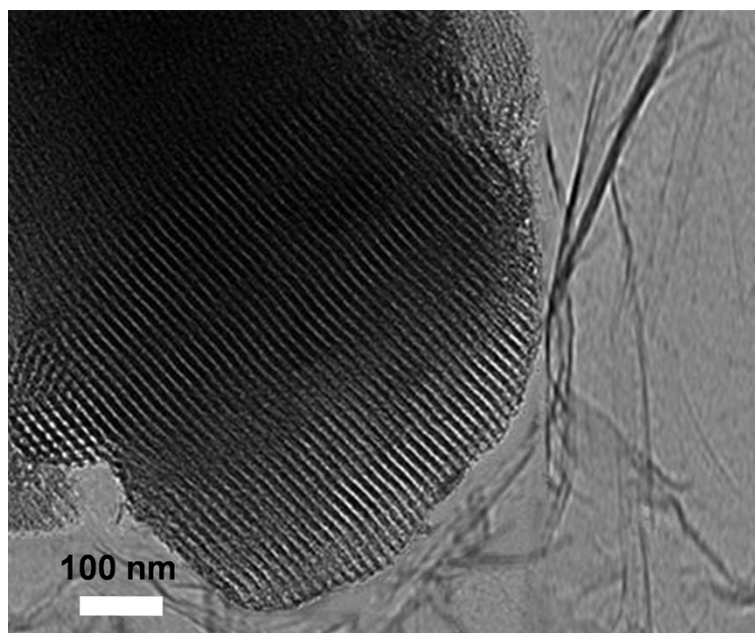

**Fig. S2** TEM image of MNb-RGO-5.
